# Supplementary material for: Efficacy of a second-line treatment and prognostic factors in patients with advanced malignant peritoneal mesothelioma: a retrospective study
Source: Research Square preprint supplement (doi:10.21203/rs.3.rs-139312/v1), 2021-01-12
Supplement: Supplementary file 1 [file 2102bc48e58a782668fed1f7.docx]

**Additional material**

Additional file 1. Treatment response in patients with measurable lesions.

| Response | Patient number (%) |
| --- | --- |
| First-line treatment | n = 25 (% in the first line treatment) |
| Complete response | 0 (0.0) |
| Partial response | 5 (20.0) |
| Stable disease | 10(40.0) |
| Progression disease | 7 (28.0) |
| Not assessed | 3 (12.0) |
| Overall response rate | 5 (20.0), (95% CI: 6.8-40.7%) |
| DCR | 15 (60.0), (95% CI: 38.7-78.9%) |
| Second-line treatment | n = 12 (% in the second line treatment) |
| Complete response | 0 (0.0) |
| Partial response | 1 (8.3) |
| Stable disease | 2 (16.7) |
| Progression disease | 7 (58.3) |
| Not assessed | 2 (16.7) |
| Overall response rate | 1 (8.3) |
| DCR | 3 (25.0) |

Abbreviations: DCR, disease control rate (complete response + partial response + stable disease).

Additional file 2. Univariate analyses for overall survival.

| Covariate |  | *p*-value |
| --- | --- | --- |
| Age categorization | < 70 | 0.99 |
|  | ≥ 70 (reference) |  |
| Sex | Male | 0.16 |
|  | Female (reference) |  |
| Ascites | Yes | 0.49 |
|  | No (reference) |  |
| Asbestos exposure | Yes | 0.77 |
|  | No or unknown (reference) |  |
| Histology | Epithelial type | 0.69 |
|  | Others or unknown (reference) |  |
| ECOG PS | 0-1 | 0.48 |
|  | 2 (reference) |  |
| Distant metastases | Yes | 0.2 |
|  | No (reference) |  |

Abbreviations: ECOG PS, Eastern Cooperative Oncology Groups Performance Status.

Additional file 3. Patient characteristics and efficacy of second-line therapy.

| Characteristics |  | Patient number (n = 26) | Median OS after 2nd line therapy (95% CI), months |
| --- | --- | --- | --- |
| Median age, years (range) |  | 63 (43–82) | 9.92 (4.76–NA) |
| Age categorization | < 63 | 13 | 7.33 (7.23–NA) |
|  | ≥ 63 | 13 | 10.22 (1.91–NA) |
| Sex | Male | 20 | 9.92 (4.76–NA) |
|  | Female | 6 | 7.23 (3.22–NA) |
| Asbestos exposure | Yes | 8 | 7.34 (2.30–NA) |
|  | No or unknown | 18 | 10.22 (3.22–NA) |
| Histology | Epithelial type | 14 | 12.55 (4.76–NA) |
|  | Others or unknown | 12 | 8.62 (1.91–NA) |
| ECOG PS | 0-1 | 25 | 9.92 (3.22–NA) |
|  | 2 | 1 | NA (NA–NA) |
| Distant metastases | Yes | 14 | 10.22 (2.30–NA) |
|  | No | 12 | 7.33 (4.76–NA) |
| Cycles of platinum doublet | < 6 | 9 | 1.79 (0.66–NA) |
|  | > 6 | 17 | 10.22 (7.23–NA) |

Abbreviations: ECOG PS, Eastern Cooperative Oncology Group Performance Status; OS, overall survival; NA, not assessed;
